1 Production of multiple bacteriocins, including the novel bacteriocin gassericin M, by *Lactobacillus*  
2 *gasseri* LM19, a strain isolated from human milk

3

4 Enriqueta Garcia-Gutierrez<sup>1,2</sup> 0000-0001-5683-7924

5 Paula M. O'Connor<sup>2,3</sup> 0000-0001-6462-2077

6 Ian J. Colquhoun<sup>1</sup>

7 Natalia M. Vior<sup>4</sup> 0000-0003-1890-3884

8 Juan Miguel Rodríguez<sup>5</sup>

9 Melinda J. Mayer<sup>1</sup> 0000-0002-8764-2836

10 Paul D. Cotter<sup>2,3\*</sup> 0000-0002-5465-9068

11 Arjan Narbad<sup>1</sup>

12

13

14 <sup>1</sup> Gut Microbes and Health, Quadram Institute Bioscience, Norwich, UK

15 <sup>2</sup> Food Bioscience Department Teagasc Food Research Centre, Moorepark, Fermoy, Cork, Ireland

16 <sup>3</sup> APC Microbiome Ireland, University College Cork, Cork, Ireland

17 <sup>4</sup> Molecular Microbiology, John Innes Centre, Norwich, UK

18 <sup>5</sup> Dpt. Nutrition and Food Science, Complutense University of Madrid, Madrid, Spain

19

20 \*Corresponding author:

21 Paul D. Cotter

22 paul.cotter@teagasc.ie

23

24

## 25 **Abstract**

26 Bacteriocins are antimicrobial peptides produced by bacteria and their production by health-promoting  
27 microbes is regarded as a desirable probiotic trait. We found that *Lactobacillus gasseri* LM19, a strain  
28 isolated from human milk, exhibits antagonistic activity against different enteropathogens and produces  
29 several bacteriocins, including a novel bacteriocin, gassericin M. These bacteriocins were purified from  
30 culture and synthesised to investigate their activity and potential synergy. *L. gasseri* LM19 was tested  
31 in a complex environment mimicking human colon conditions where it not only survived but expressed  
32 the seven bacteriocin genes and produced short chain fatty acids. Metagenomic analysis of these *in vitro*  
33 colon cultures showed that co-inoculation of *L. gasseri* LM19 with *Clostridium perfringens* gave  
34 profiles with more similarity to controls than to vessels inoculated with *C. perfringens* alone. This makes  
35 *L. gasseri* LM19 an interesting candidate for further study for maintaining homeostasis in the gut  
36 environment.

37

38 **Keywords:** bacteriocin, antimicrobial, SCFA, gassericin, colon model

39

## 40 **Introduction**

41 Beneficial bacteria have consistently been harnessed throughout human history. Most recently, the rise  
42 of antimicrobial resistance among pathogens, a greater demand for healthy foods and an increasing  
43 appreciation of the importance of the human gut microbiota have brought attention back to natural  
44 sources of new antimicrobials, food preservatives and probiotics. The search for natural antimicrobials  
45 can involve a variety of approaches (Lewis, 2013), including taking advantage of the fact that, in nature,  
46 bacteria from a specific environmental niche are able to compete against other bacteria from the same  
47 niche in a variety of ways (Czárán *et al.*, 2002; Kelsic *et al.*, 2015). Such bacterial antagonism can be  
48 through non-specific strategies, like the production of organic acids. Some organic acids, particularly  
49 the short-chain fatty acids (SCFA), acetate, propionate, and butyrate, are produced in millimolar  
50 quantities in the gastrointestinal (GI) tracts of animals and humans and, in addition to their antagonistic  
51 activities, confer other health benefits (LeBlanc *et al.*, 2017; Singh *et al.*, 2018). Target-specific  
52 antagonistic activities can be provided by compounds such as bacteriocins (Garcia-Gutierrez *et al.*,  
53 2018), a heterogeneous group of ribosomally-synthesised peptides that represent a potential alternative  
54 to traditional antibiotics because of their frequent low toxicity, high potency, ability to be bioengineered,  
55 low likelihood of resistance development and the possibility of being produced *in situ* by probiotics  
56 (Cotter *et al.*, 2013; Field *et al.*, 2015; Hegarty *et al.*, 2016).

57 *Lactobacillus* spp. are members of the lactic acid bacteria (LAB) and contribute to the production of  
58 many fermented foods, as well as being important components of the human gut microbiota.  
59 *Lactobacillus* and other LAB are considered an important source of antimicrobial peptides (Collins *et al.*,  
60 2017). *Lactobacillus gasseri* is one of six species which previously comprised the *L. acidophilus*  
61 complex (Fujisawa *et al.*, 1992; Sarmiento-Rubiano *et al.*, 2010). These species are considered  
62 ecologically and commercially important and have been extensively studied, frequently revealing  
63 antimicrobial and other probiotic properties (Abramov *et al.*, 2014; Karska-Wysocki *et al.*, 2010; Kim  
64 *et al.*, 2007; Selle and Klaenhammer, 2013; Yamano *et al.*, 2007). *L. gasseri* has been divided in two  
65 subgroups on the basis of average nucleotide identity (ANI) (Tada *et al.*, 2017) and strains have been  
66 previously isolated from the gut of animals and humans, vaginal tract, human milk and oral cavity.  
67 Strains of *L. gasseri* have been found to produce bacteriocins, frequently referred to as gassericins,  
68 corresponding to different classes. Gassericin A is a cyclic class IIc bacteriocin produced by *L. gasseri*  
69 LA39 that was isolated and purified from a human infant faecal sample (Kawai *et al.*, 1994; Pandey *et al.*,  
70 2013). Gassericins B1, B2, B3 and B4 were isolated from vaginal isolate *L. gasseri* JCM 2124 with  
71 B1 and B3 being identical to the  $\alpha$  and  $\beta$  peptides of the two-component bacteriocin acidocin J1132  
72 from *Lactobacillus acidophilus* and B2 and B4 suggested to be modified forms of B3 (Tahara *et al.*,

73 1997). Production of gassericin T (GasT) was first reported in *L. gasseri* SBT 2055, a strain isolated  
74 from adult human faeces (Kawai *et al.*, 2000). The amino acid sequence of GasT shows high similarity  
75 to one of the peptides (LafA) of the two-component lactacin F family produced by *Lactobacillus*  
76 *johnsonii* VPI11088 (Kawai *et al.*, 2000). Along with the LafA peptide, *L. johnsonii* produces another  
77 hydrophobic peptide, LafX, which was highly similar to lactobin A and the predicted product of *gatX*  
78 found in the operon of *L. gasseri* SBT 2055 (Kawai *et al.*, 2000). GatX was ultimately detected and its  
79 antimicrobial activity was confirmed (Mavrič *et al.*, 2014) and the corresponding bacteriocin has been  
80 assigned to class IIb. This was considered an important finding, because in some instances where two  
81 peptides are involved, one of the peptides is usually described as active and the other as the  
82 complementary factor (cf) without antimicrobial activity, based on similarities with lactacin F  
83 complementary component. Acidocins LF221A and LF221B were isolated from *L. acidophilus* LF221  
84 (later renamed *L. gasseri* LF221), a strain isolated from infant faeces (Bogovic-Matijasic *et al.*, 1998),  
85 but the suggested assignment to the two-peptide bacteriocin group (Class IIb) has not been established  
86 experimentally (Maldonado-Barragán *et al.*, 2016). *L. gasseri* K7 was also isolated from the faeces of a  
87 breast-fed baby and two two-peptide bacteriocin-encoding operons were found in its genome (Zorič  
88 Peternel *et al.*, 2010). These potential peptides shared a high homology to acidocins LF221A and  
89 LF221B and gassericin T peptides, respectively (Mavrič *et al.*, 2014). Isolation and purification of  
90 gassericin E from *L. gasseri* EV1461 isolated from the vagina of a healthy woman has been reported  
91 (Maldonado-Barragán *et al.*, 2016). Gassericin E exhibits high similarity to gassericin T, differing by  
92 only by one amino acid residue across the mature peptide (Maldonado-Barragán *et al.*, 2016).  
93 Interestingly, the gassericin E operon also presents a putative bacteriocin -encoding gene, *gaeX*, whose  
94 product shares 100% identity with GatX of *L. gasseri* SBT 2055 and gassericin K7 B of *L. gasseri* K7  
95 (Maldonado-Barragán *et al.*, 2016). Finally, genes encoding gassericin T (GatA and GatX) and the novel  
96 gassericin S, with similarity to acidocin LF221A (GasA and GasX), were all found in the genome of *L.*  
97 *gasseri* LA327, isolated from human large intestine tissue (Kasuga *et al.*, 2019). Kasuga *et al.*  
98 demonstrated the synergistic activity between the two components of gassericin T, and those of  
99 gassericin S (Kasuga *et al.*, 2019). However, they could not demonstrate synergistic activity between  
100 gassericin S and gassericin T when they mixed the four peptides together.

101 Here we report a new *L. gasseri* strain, LM19, isolated from human milk, which possesses three  
102 bacteriocin clusters in its genome, including one encoding a novel bacteriocin, designated gassericin M.  
103 Genes with homology with the paired peptides of gassericin T and gassericin S were also found in its  
104 genome. All six peptides were purified and tested for antimicrobial activity. We also demonstrated that  
105 LM19 survives, expresses all the bacteriocin genes and produces SCFA in detectable amounts in a  
106 complex faecal environment mimicking colon conditions, and that it can help to maintain the  
107 composition of the microbiome in the presence of the pathogen *Clostridium perfringens*.

108

## 109 **Methods**

### 110 *Isolation and whole genome sequencing of L. gasseri LM19*

111 *L. gasseri* LM19 was originally isolated from breast milk on MRS agar (Oxoid) at 37°C and has been  
112 deposited in the National Collection of Industrial, Food and Marine Bacteria (NCIMB) with the  
113 accession number NCIMB 15251. Whole genome sequence was provided by MicrobesNG  
114 (Birmingham, UK) using Illumina® HiSeq and a 250 bp paired end protocol. Genome coverage was  
115 30x. Reads were trimmed using Trimmomatic 0.30 with a sliding window quality cutoff of Q15 (Bolger  
116 *et al.*, 2014) and the quality was assessed using software Samtools (Li *et al.*, 2009), BedTools (Quinlan  
117 and Hall, 2010) and BWA mem (Li and Durbin, 2010). SPAdes 3.7 (Bankevich *et al.*, 2012) was used  
118 for *de novo* assembly and annotation was performed using Prokka 1.11 (Seemann, 2014).

119

### 120 *Bioassay-based screening for antimicrobial activity*

121 For antimicrobial overlay assays, 5 µl aliquots of *L. gasseri* LM19 overnight cultures were spotted onto  
122 agar plates (containing 2% w/v NaHCO<sub>3</sub> to counteract inhibition from lactic acid) and incubated for up  
123 to 48 h. Bacterial spots were exposed to UV light for 15 min before being covered with 5 ml soft agar  
124 (0.7%) cooled to <50°C and inoculated with 100-200 µl of an overnight culture of an indicator strain.  
125 Overlaid plates were incubated overnight at the appropriate conditions for the indicator strain.  
126 Antimicrobial activity was considered positive if a zone of inhibition was seen (Balouiri *et al.*, 2016).  
127 For cross streak assays, *L. gasseri* LM19 was streaked onto an agar plate containing 2% NaHCO<sub>3</sub> and  
128 incubated to allow growth. Streaks were exposed to UV light for 15 min and cross-streaked with  
129 different indicator strains. For drop tests, indicator strains were cultured overnight and diluted 1:100 in  
130 phosphate buffer saline (PBS). 100 µl was spread onto agar plates to produce a lawn. 10 µl of cell free  
131 supernatants of *L. gasseri* LM19 cultures, centrifuged at 16,000 × *g* for 2 min and filtered through a 0.22  
132 µm filter (Millipore, UK) were spotted onto the lawn. For filter disc tests, the drop test method was  
133 followed but supernatants were spotted onto a 3MM Whatman filter disc that was placed onto the  
134 bacterial lawn then plates were kept at 4°C for 2 h to allow diffusion through the agar. All plates were  
135 incubated overnight in appropriate conditions for the indicator strains. For well-diffusion assays, agar  
136 plates were poured containing 1 ml overnight culture of the indicator strain. 50 µl of cell-free *L. gasseri*  
137 LM19 bacterial supernatants were placed in wells made with a cork borer; plates were kept at 4°C for 2  
138 h to allow diffusion and incubated overnight. Inhibitory activity was assessed by measuring the radius  
139 of inhibition (mm).

140 To assess antimicrobial activity against *Campylobacter jejuni*, Skirrow plates (Oxoid) were inoculated  
141 with 50 µl of a *C. jejuni* stock in 40% glycerol and incubated overnight at 37°C in microaerobic  
142 conditions (85% N<sub>2</sub>, 5% O<sub>2</sub>, 10% CO<sub>2</sub>) in a MACS-MG-1000 controlled atmosphere cabinet (Don  
143 Whitley Scientific, UK). The following day, cells grown on the plate were resuspended in 2 ml PBS and  
144 a dilution of final optical density at 600 nm (OD<sub>600</sub>) = 1 was prepared in PBS. 5 ml Brucella/agar mix  
145 (1.5 g agar in 100 ml of Brucella broth (Oxoid, UK) with 0.01% triphenyl tetrazolium chloride [TTC])  
146 were added to 1 ml cell aliquots and poured onto a fresh Brucella plate. Filter discs placed onto the agar  
147 were spotted with 10 µl *L. gasseri* LM19 cell free supernatants. 10% hydrogen peroxide was used as a  
148 positive control.

149 Bacterial strains used were obtained from culture collections (ATCC, American Type Culture  
150 Collection; DSMZ, Deutsche Sammlung von Mikroorganismen und Zellkulturen; NCTC, National  
151 Collection of Type Cultures) or were from in-house collections. Strains and culture conditions were: *L.*  
152 *gasseri* LM19 (MRS, 37°C, anaerobic, static), *Salmonella enterica* LT2 (LB, 37°C, anaerobic, static),  
153 *Escherichia coli* ATCC 25922 (LB, 37°C, anaerobic, static), *Cronobacter sakazakii* DSMZ 4485 (BHI,  
154 37°C, anaerobic, static), *Clostridium perfringens* NCTC 3110 (BHI, 37°C, anaerobic, static), *Listeria*  
155 *innocua* NCTC 11288 (BHI, 37°C, anaerobic, static), *Lactobacillus delbrueckii* subsp. *bulgaricus* (*L.*  
156 *bulgaricus*) 5583 (MRS, 37°C, anaerobic, static), *L. bulgaricus* LMG 6901 (MRS, 37°C, aerobic, static),  
157 *Campylobacter jejuni* NCTC 11168 (Brucella, 37°C, microaerobic, static), and *Micrococcus luteus*  
158 FI10640 (MRS, 37°C, aerobic, static). Media was sourced from Oxoid.

#### 159 160 *In silico* identification of bacteriocin gene clusters

161 The *L. gasseri* LM19 genome was analysed with software to identify putative bacteriocin clusters:  
162 BAGEL 3 and BAGEL 4 (van Heel *et al.*, 2013) to target bacteriocin clusters and antiSMASH to target  
163 secondary metabolites (Weber *et al.*, 2015). The assembly was also annotated with RAST (Rapid  
164 Annotation using Subsystem Technology) and visualised with SEED (Brettin *et al.*, 2015). Genome data  
165 was visualised using Artemis (Carver *et al.*, 2012). DNA and amino acid sequences identified as putative  
166 bacteriocin genes and proteins were analysed using BLAST (Altschul, 1990) to assess their relationships  
167 with other peptides using default parameters. Geneious Tree Builder v11.1 (Biomatter, New Zealand)  
168 was used to compare the gasserins.

169

#### 170 *Detection and purification of antimicrobial peptides*

171 *L. gasseri* LM19 was grown anaerobically at 37°C in 2 l MRS broth for 24-48 h. The culture was  
172 centrifuged (8,000 × g, 20 min, 10°C) to separate cells from supernatant, and both cells and supernatant  
173 were analysed independently. The cell pellet was resuspended in 400 ml 70% propan-2-ol, 0.1%  
174 trifluoroacetic acid (TFA – ‘IPA’) using a stirrer for 3-4 h at room temperature, centrifuged again and  
175 the supernatant retained for further purification and activity testing by drop test using *L. bulgaricus*  
176 LMG 6901 as an indicator strain. IPA was removed from this extract by rotary evaporation until the  
177 sample volume was 120 ml, and it was applied to a 2g 12 ml Strata® C<sub>18</sub>-E solid-phase extraction (C18-  
178 SPE) column (Phenomenex, UK), pre-equilibrated with methanol and water following manufacturer’s  
179 instructions. The column was washed with 20 ml of 30% ethanol and 20 ml of 30% acetonitrile and the  
180 active fraction was eluted with 30 ml of IPA. The IPA was removed from the C18 SPE IPA eluate and  
181 4 ml aliquots of sample applied to a semi preparative Jupiter C5 Reversed Phase HPLC column (10 x  
182 250 mm, 10 µm, 300Å) (Phenomenex, Cheshire, UK) (HPLC run I) running a 30-70% acetonitrile 0.1%  
183 formic acid (FA) gradient over 95 minutes where buffer A is 0.1% FA and buffer B is 100% acetonitrile  
184 0.1% FA. Flow rate was 2.5 ml/min and fractions were collected at 1 min intervals. The fractions were  
185 further analysed by matrix assisted laser deionisation -time of flight-mass spectrometry (MALDI-TOF-  
186 MS; Axima TOF<sup>2</sup> MALDI-TOF mass spectrometer in positive-ion reflectron mode, Shimadzu Biotech,  
187 UK) to determine the masses of the potential peptides. For purification from the cell-free supernatant,  
188 the supernatant was applied to an Econo-column (BioRad, UK) containing 60 g Amberlite XAD 16N.  
189 The column was washed with 400 ml 35% ethanol followed by 400 ml 30% acetonitrile and  
190 antimicrobial activity eluted with 450 ml IPA. The IPA was removed from the XAD IPA eluate by  
191 rotary evaporation until the sample volume was 145 ml and it was then applied to a 5 g 20 ml C18-SPE  
192 column pre-equilibrated with methanol and water following manufacturer’s instructions. The column  
193 was washed with 30 ml 30% ethanol followed by 30 ml 30% acetonitrile and antimicrobial activity  
194 eluted with 30 ml IPA and fractionated by semi-preparative reversed phase HPLC as before. To increase  
195 purity, some HPLC fractions were reapplied to the C5 semi prep column, running shallower gradients.  
196 Specifically, 30-40% acetonitrile 0.1% FA gradient over 95 min for GamX and Bact\_2, 30-45% gradient  
197 for GamA, and 35-65% gradient for Bact\_1, GamM and GamY. Additionally, the six peptides were  
198 synthesised using microwave-assisted solid phase peptide synthesis (MW-SPPS) performed on a Liberty  
199 Blue microwave peptide synthesizer (CEM Corporation, USA). GamA and GamM were synthesised on  
200 a H-Lys(BOC)-HMPB)-ChemMatrix® resin, GamX was synthesised on H-Asn(Trt)-HMPB-  
201 ChemMatrix® resin, Bact\_1 and Bact\_2 on H-Arg(PBF)-HMPB-ChemMatrix® resin and GamY on  
202 Fmoc-Phe-Wang (Novobiochem®, Germany) resin. Crude peptide was purified using RP-HPLC on a  
203 Semi Preparative Vydac C4 (10 x 250mm, 5µ, 300Å) column (Grace, USA) running acetonitrile-0.1%  
204 TFA gradients specific to the peptide of interest. Fractions containing the desired molecular mass were  
205 identified using MALDI-TOF-MS on an Axima TOF2 MALDI TOF mass spectrometer and were pooled  
206 and lyophilized on a Genevac HT 4X lyophilizer (Genevac Ltd., UK). All naturally produced peptides  
207 and synthetic peptides, from HPLC runs, were assayed by well-diffusion assay using *L. bulgaricus*  
208 DPC6091 to compare activity and to assess synergistic activity among them.

209

#### 210 *Transformation of L. gasseri LM19*

211 Electro-competent cells of *L. gasseri* LM19 were made based on the method described previously (Holo  
212 and Nes, 1989). Competent cells were resuspended in 2.25 ml 10% glycerol/ 0.5 M sucrose, aliquoted  
213 in volumes of 40 µl and either used immediately or frozen on dry ice. 500 ng of plasmid pUK200  
214 (Wegmann *et al.*, 1999) were added to 40 µl of electro-competent cells. The mixture was incubated for  
215 1 min on ice and transferred to a pre-chilled electroporation cuvette (Geneflow Limited, UK). A pulse  
216 of 1500 V, 800 Ω and 25 µF was applied using a BioRad electroporator. 450 µl of pre-chilled MRS/ 20



217 mM MgCl<sub>2</sub>/ 2 mM CaCl<sub>2</sub> were added to the cuvette and the mixture transferred to a chilled 2 ml tube  
218 and incubated for 2 h at 37°C. Aliquots were plated on MRS with 7.5 µg/ml chloramphenicol and  
219 incubated overnight at 37°C. Transformants were confirmed by colony PCR using Go Taq G2  
220 polymerase (Promega) and primers p181 (5'-GCGAAGATAACAGTGAAG-3' and p54 (5'-  
221 CCGCTCTGATTAATTCTGAAG-3') (Sigma, UK).

222

### 223 *Fermentation studies*

224 *L. gasseri* LM19 was inoculated at 1% in 20 ml of prepared in-house MRS without glucose (10 g/l  
225 trypticase peptone (Difco, UK), 2.5 g/l yeast extract (Difco, UK), 3 g/l K<sub>2</sub>HPO<sub>4</sub> (Sigma, UK), 3 g/l  
226 KH<sub>2</sub>PO<sub>4</sub> (Sigma, UK), 2 g/l tri-ammonium citrate (Sigma, UK), 0.2 g/l pyruvic acid (Sigma, UK), 0.3  
227 g/l cysteine-HCl (Sigma, UK), 0.575 g/l MgSO<sub>4</sub> · 7H<sub>2</sub>O (Sigma, UK), 0.12 g/l MnSO<sub>4</sub> · 7H<sub>2</sub>O (Sigma,  
228 UK), 0.034 g/l FeSO<sub>4</sub> · 7H<sub>2</sub>O (Sigma, UK) and 1 ml Tween 80 (Sigma, UK)), or batch model media,  
229 prepared as described previously (Parmanand *et al.*, 2019). The pH was adjusted to 6.8 in both media  
230 and filter sterilized carbohydrate source supplementation (glucose, lactose, galactose, inulin, starch or  
231 pectin [Sigma, UK]) was added at 2% after autoclaving. Fermentations were incubated in anaerobic  
232 conditions at 37°C over 48 h, conducted in triplicate and 2 ml of each sample were collected at 24 h and  
233 48 h. 1 ml was used for enumeration by plate count, pH measurement using a pH-000-85282 probe  
234 (Unisense, Denmark) and, once filter sterilized, antimicrobial activity using a well diffusion assay; the  
235 other was centrifuged at 16,000 x g and the cell-free supernatant stored at -20°C for further analysis.

236

### 237 *In vitro colonic batch model fermentation*

238 Fermentations to simulate human colon conditions were performed as described previously (Parmanand  
239 *et al.*, 2019). A faecal dilution was prepared with 10 g of fresh faecal sample diluted 1:10 in PBS,  
240 homogenised using a Circulator 400 stomacher bag (Seward, UK) in a Stomacher 400 circulator  
241 (Seward, UK) for two cycles of 45 s at 230 rpm and then transferred to pre-reduced batch model media  
242 in a proportion 1:10, to a final volume of 150 ml, in 270 ml water-jacketed vessels (Soham Scientific,  
243 UK). The temperature was maintained at 37°C by a circulating water bath. Batch model media was  
244 prepared as stated before, and 1% glucose was added as a carbohydrate source. Cultures were stirred,  
245 anaerobic conditions were maintained with oxygen-free nitrogen and pH maintained between 6.6 -7.0  
246 by adding 1M NaOH or 1M HCl with automated pH controllers (Electrolab Ltd, UK) (Parmanand *et al.*,  
247 2019). Overnight cultures of *L. gasseri* LM19 pUK200 and *C. perfringens* NCTC 3110 were added to  
248 the vessels at 1% each. 6 ml samples were extracted at 0 h, 4 h, 8 h, 24 h and 48 h for DNA and RNA  
249 extractions, SCFA analysis and enumeration of *L. gasseri* LM19 pUK200 by plate count on MRS  
250 supplemented with 7.5 µg/ml chloramphenicol. Experiments were carried out in triplicate using three  
251 different faecal donors.

252 To test *L. gasseri* LM19 bacteriocin gene expression in faecal samples, 3 ml of each aliquot at different  
253 time points was treated for RNA extraction, cleaning and cDNA synthesis. Briefly, each sample was  
254 mixed with two volumes of RNeasy Lysis Buffer (Sigma Aldrich, UK) and centrifuged for 10 min at 18,000 × g at  
255 4°C. The supernatant was discarded, and pellets stored at -80°C until extraction. Extraction was  
256 performed using the Qiagen RNeasy extraction kit with minor modifications. Pellets were resuspended  
257 in 1 ml RLT buffer provided in the kit, complemented with 10 µl of β-mercaptoethanol (Millipore, UK)  
258 and transferred to lysing matrix E tubes (MP Biomedicals LLC, France). Samples were lysed in a  
259 FastPrep-24 homogeniser (MP Biomedicals) by applying 2 pulses of 30 s and intensity 6.0 with an  
260 interval of 1 min on ice between each pulse. Samples were centrifuged for 10 min at 17,000 × g and the  
261 supernatant transferred to clean 15 ml tubes and mixed with an equal volume of 70% ethanol. 70% of  
262 the mixture, including any precipitate, was transferred to spin tubes and centrifuged at 8,000 × g for 1  
263 min and following steps were as the manufacturer's instructions. The RNA was eluted in 100 µl RNase-  
264 free water and quantified by NanoDrop 2000 (Thermo Scientific, UK). DNase treatment was performed

265 using the Turbo DNA-free™ kit (Invitrogen, UK) following the manufacturer's protocol. cDNA  
266 synthesis was carried out using the QuantiTect® Reverse Transcription Kit (Qiagen, UK) using 100 ng  
267 RNA per reaction. Reverse transcription was conducted according to manufacturer's recommendations  
268 and a control reaction replacing the reverse transcriptase with water was set up at the same time. The  
269 presence or absence of *L. gasseri* LM19 bacteriocin genes was confirmed by PCR (Treven *et al.*, 2013).  
270 Primers (Table 1) were designed using Primer 3 (v. 0.4.0). The presence of secondary structures and  
271 dimers were tested with Netprimer (Premier Biosoft) and primers were tested using genomic DNA from  
272 *C. perfringens* NCTC 3110, extracted using the genomic tip-20 and genomic buffer set kits (Qiagen,  
273 Germany), to confirm their specificity. Thermal cycling was performed using a Verity 96 well Thermal  
274 Cycler (Applied Biosystems) using GoTaq G2 DNA polymerase (Promega) according to manufacturer's  
275 instructions. Primers used are summarised in Table 1 and cycle conditions were the same as for qRT-  
276 PCR. dNTPs were provided by Bioline. PCR products were visualized using 2% agarose gels. qRT-PCR  
277 was performed using 384-well plates (4titude Ltd, UK) in the ViiA™ 7 System (Applied Biosystems,  
278 UK) with the SensiFAST™ SYBR® No-ROX Kit (Bioline, USA). Reaction mix composition was, for  
279 a final volume of 6 µl, 0.6 µl of cDNA template, 3 µl of 2x SensiFAST SYBR® No-ROX mix, 0.24 µl  
280 of each primer (10 µM stock) and 1.92 µl of water. Reaction conditions were set up at 20 sec at 95°C,  
281 40 cycles of 1 sec at 95°C, 20 sec at 60°C and 15 sec at 95°C, and a melt curve of 15 min at 65°C.  
282 Reactions were set up in duplicate and controls for primers and no transcriptase samples were set in  
283 each run. Baseline for change was established at 2X upregulation or downregulation.

284  
285 For DNA extraction, 16S rRNA amplification and sequencing and 16S rRNA-based metataxonomic  
286 analysis, 3 ml of each aliquot at different time points was treated for DNA extraction using the FastDNA  
287 Spin Kit for Soil (MP Biomedicals) following manufacturer's guidelines. Total DNA concentration was  
288 measured by Qubit 3 (Invitrogen, UK) and normalized. The V4 region of the 16S rRNA gene was used  
289 for high throughput sequencing using the Illumina MiSeq platform. Data analysis was conducted using  
290 Quantitative Insights into Microbial Ecology (QIIME2 version 2018.11) (Bokulich *et al.*, 2018).  
291 A standard curve for *C. perfringens* NCTC 3110 was constructed by extracting gDNA as described  
292 previously (Ladero *et al.*, 2011) at different concentrations (colony forming units (cfu)/ml) of *C.*  
293 *perfringens* NCTC 3110. Each DNA concentration was measured using qPCR to determine the cycle  
294 signal associated with each cell concentration. Colon model treatments were analysed by RT-qPCR and  
295 total cfu were calculated for each treatment.

296  
297 SCFA were measured using proton NMR (Parmanand *et al.*, 2019). Dilution buffer (D<sub>2</sub>O: 0.26 g  
298 NaH<sub>2</sub>PO<sub>4</sub>, 1.44 g K<sub>2</sub>HPO<sub>4</sub>, 17.1 mg sodium 3-(Trimethylsilyl)-propionate-d<sub>4</sub> (TSP), 56 mg NaN<sub>3</sub> in 100  
299 ml) was mixed with cell-free sample supernatant in a proportion 1:10. 500 µl were collected in 5 mm  
300 NMR Tubes (GPE Scientific Ltd, UK). High resolution <sup>1</sup>H NMR spectra were recorded on a 600 MHz  
301 Bruker Avance III HD spectrometer fitted with a 5 mm TCI cryoprobe and a 60 slot autosampler  
302 (Bruker, Germany). Sample temperature was controlled at 300 °K and the D<sub>2</sub>O signal was used as lock.  
303 Each spectrum consisted of 512 scans of TD = 65,536 data points with a spectral width of 20.49 ppm  
304 (acquisition time 2.67 s). The *noesygppr1d* presaturation sequence was used to suppress the residual  
305 water signal with low power selective irradiation at the water frequency during the recycle delay (D1 =  
306 3 s) and mixing time (D8 = 0.01 s). A 90° pulse length of approximately 8.8 µs was used, with the exact  
307 pulse length determined automatically for each sample. Spectra were transformed with 0.3 Hz line  
308 broadening and zero filling and were automatically phased and referenced (to TSP) using the TOPSPIN  
309 3.2 software. The resulting Bruker 1r files were converted to Chenomx (.cnx) format using the 'Batch  
310 Import' tool in the Processor module of Chenomx NMR Suite v8.12 with the TSP concentration set to  
311 0.1 mM. Concentrations were obtained using the Chenomx Profiler module (Chenomx Inc, Canada).

312

313 *Statistical analysis*

314 Significant differences between groups were established using a paired *t*-test, assuming normal  
315 distribution, equal variances. Both sides of the distribution were considered. Significance was  
316 considered when *P* value was <0.05.

317

318 **Results**

319 *Antimicrobial activity*

320 The antimicrobial activity of *L. gasseri* LM19, was assessed against a variety of Gram-positive and  
321 Gram-negative pathogens (Table 2), using a number of different approaches. The assay method affected  
322 the outcome, with the targets typically being more sensitive to LM19 grown on agar than to its cell free  
323 supernatant. The growth of *C. perfringens* NCTC 3110 and *L. bulgaricus* 5583 was inhibited by overlay  
324 assays. Cross-streaks showed antimicrobial activity against all Gram-positive indicators and *C.*  
325 *sakazakii*, while supernatants exhibited activity by filter disc against *L. bulgaricus*, *C. jejuni* and *M.*  
326 *luteus*. Well-diffusion assay only inhibited the growth of *L. bulgaricus*. As *L. bulgaricus* was the most  
327 sensitive indicator, it was used in subsequent tests.

328

329 *Identification of bacteriocin gene clusters in the genome of L. gasseri LM19*

330 The sequenced genome of *L. gasseri* LM19 was assembled into contigs and submitted to the NCBI  
331 under accession number SHO00000000. RAST analysis failed to reveal any bacteriocin clusters of  
332 interest, antiSMASH 3.0 indicated the presence of a single Microcin M-like cluster, while BAGEL 4,  
333 which specifically targets regions with bacteriocin similarities, found three clusters predicted to encode  
334 a number of potential bacteriocins. Manual investigation confirmed the presence of two clusters, whose  
335 putative structural peptides showed a high similarity to previously identified antimicrobial peptides from  
336 Class IIb bacteriocins (clusters 1 and 3), and a helveticin-like protein (cluster 2). The latter contained no  
337 other bacteriocin-associated genes on the basis of Blastp analysis; the product of the single gene showed  
338 31.9 % identity and 43.1% amino acid consensus to helveticin J, which was originally characterised in  
339 *Lactobacillus helveticus* following heterologous expression (Joerger and Klaenhammer, 1986).

340 Cluster 1 (939 bp) is highly similar to the class IIb gassericin K7A cluster (EF392861) with 99%  
341 nucleotide identity. The cluster was predicted to encode two short peptides with leader sequences  
342 (Bact\_1 and Bact\_2) and a putative immunity protein (Fig.1a). Bact\_1 and Bact\_2 show 100% amino  
343 acid similarity with the gassericin S structural peptides GasA and GasX respectively (Kasuga *et al.*,  
344 2019), while the surrounding genes do not resemble any other genes known to be associated with  
345 bacteriocin production. The putative immunity protein showed 97% amino acid homology to those of  
346 the acidocin LF221A and gassericin S clusters (Kasuga *et al.*, 2019; Majhenič *et al.*, 2004).

347 Cluster 3 is 9736 bp in length and the first open reading frames (orfs) 1-8 show a high nucleotide  
348 homology to the gassericin T cluster from *L. gasseri* LA158 (AB710328, 99% over 100% coverage)  
349 and the gassericin E cluster from EV1461 (KR08485, 99% over 95% coverage) (Fig. 1a). There are two  
350 structural peptide-encoding genes, *gamA* and *gamX*, that are preceded by homologues of the gassericin  
351 E cluster as described previously (Maldonado-Barragán *et al.*, 2016). It is likely that they perform the  
352 same predicted functions as their gassericin E homologues, i.e., *gamP*, *gamK*, *gamR* for regulation,  
353 *gamT* and *gamC* for transport and, after the structural peptides, *gamI* for immunity, although a  
354 homologue to *gaeX* is missing. The predicted GamA peptide has the same sequence as GasT, Gas K7B  
355 cf and acidocin LF221B cf and has a single amino acid difference (W-L) from GasE (Table 3). The  
356 second putative peptide, GamX, has the same sequence as GatX and GaeX, all of which differ by a  
357 single amino acid (G-A) from Gas K7 B and acidocin LF221B (Table 3).

358 In cluster 3, there are 7 further orfs including two additional putative structural genes, designated as  
359 *gamM* and *gamY*, which appear to encode a two-component bacteriocin. These putative peptides also  
360 show some similarity to other two-peptide component gassericins, but to a lesser extent than those



361 previously reported (Fig. 1b). GamY shows similarity to GamM, with 25.4% identity and 47.6%  
362 consensus, and they both have similarity to K7 A cf (27.5% identity and 38.8% consensus; 25.3%  
363 identity, 44.3% consensus, respectively) and to GamA (18.7% identity, 33.3% consensus with GamM).  
364 Surrounding *gamY* and *gamM* are two genes encoding putative immunity proteins, GamI2 and GamI3,  
365 with homology to an enterocin A immunity domain (pfam 08951,  $2.8e^{-7}$  and  $1.1e^{-6}$ , respectively), a  
366 putative transport accessory protein, GamC2, with some similarity to TIGR01295 bacteriocin transport  
367 accessory protein ( $1.18e^{-9}$ ), and thioredoxin superfamily cd02947 ( $5.21e^{-7}$ ), and two orfs with no  
368 matches. The genes on either side of the cluster show amino acid homology to transporters involved in  
369 solute or cation transport, and so are not predicted to be part of the cluster.

370

#### 371 *Identification of antimicrobial peptides in culture*

372 Cell and supernatant extracts from *L. gasseri* LM19 cultures were fractionated by HPLC and analysed  
373 by MS and their antimicrobial activity was assessed using *L. bulgaricus* 6901 as an indicator (Fig. 2 and  
374 3). Antimicrobial activity was present in both cells and supernatant (Fig. 2a). MS shows that all peptide  
375 masses of interest are present.

376

#### 377 *Purification of bacteriocins from cells*

378 MS analysis of HPLC fractions showed that many fractions contained one or more peptide masses that  
379 were consistent with those predicted by *in silico* analysis of the genome (Table 3, Fig. 2 and 3). mV  
380 response was very low (40 mV compared to around 1000 mV from a good producer), suggesting that  
381 production and consequently yield was very low. A mass corresponding to GamX (4763 Da) was  
382 detected in fractions 32-36 (Fig. 3a). Fractions 37-39 showed a mass corresponding to GamA, 5541 Da  
383 (Fig. 3b). Masses corresponding to GamY and GamM co-eluted in fraction 49-55 (Fig. 3c). Fractions  
384 57-60 showed the expected mass from Bact\_1, 6060 Da (Fig. 3d). Fractions 85-97 showed putative  
385 GamM mass, 4126 Da (Fig. 3e).

386

#### 387 *Purification of bacteriocins from supernatants*

388 MS analysis of the HPLC fractions 20-97 from the first HPLC run showed masses corresponding to  
389 Bact\_1 and GamM (Fig. S1). Masses corresponding to putative Bact\_1 eluted in fractions 59-65, while  
390 putative GamM mass was detected in fractions 76-97. Masses corresponding to Bact\_2 and GamA  
391 eluted also in the first HPLC fractionation and were fractionated again. GamX eluted in fractions 86-90  
392 (Fig. 3e), and also in fractions 66-68, co-eluting with GamA. Putative Bact\_1 eluted in fractions 58-60.  
393 GamY eluted in fractions 69-72, and GamM showed in fractions 86-91 (Fig. S2 and S3).

394

#### 395 *Synergy between peptides*

396 Three sets of fractions were compared, fractions from HPLC run I, fractions from HPLC II run and  
397 synthetic peptides resuspended in milli Q water at 1 mg/ml (Fig. 4a). All synthetic peptides, except  
398 GamY, showed antimicrobial activity, with the highest activity coming from GamA and Bact\_2. Fig. 4b  
399 and c show synergy assays between synthetic peptides. We observed clear synergy between Bact\_1 and  
400 Bact\_2 and a possible synergy between Bact\_1 and GamA. No synergy was observed between GamM  
401 and GamY or between GamA and GamX.

402

#### 403 *Complex carbohydrates can favor viability and antimicrobial activity of *L. gasseri* LM19*

404 *L. gasseri* LM19 was grown in colon model medium, simulating gut conditions, or home-made MRS,  
405 alone or supplemented with simple sugars (glucose, lactose and galactose) or complex polymers (inulin,  
406 starch and pectin). In general, more viable cells were recovered from MRS; growth on simple sugars  
407 was highest at 24 h but, at 48 h, complex carbohydrates gave higher counts (Fig. 5a). Interestingly,  
408 growth in the absence of a carbon source at 48 h was similar to that with simple sugars. On batch model

409 medium, cell counts with glucose were lower than with all other treatments, and starch and pectin  
410 improved growth at 48 h. Antimicrobial activity from batch model medium with glucose was almost as  
411 high as that from MRS despite a ~3 log difference in cfu (Fig. 5b). Glucose and galactose  
412 supplementation showed the highest antimicrobial activity at 24 h while, complex carbohydrates  
413 produced the highest activity after 48 h. At 48 h, higher levels of antimicrobial activity correlated with  
414 lower pH values and higher levels of cfu.

415 The changes in activity with carbon supplementation over time suggest control of antimicrobial  
416 production in different nutritional environments. Examination of bacteriocin gene expression in MRS  
417 also showed that no carbon supplementation increased the expression of *gamM* and *gamY* significantly  
418 at 48 h. Starch supplementation increased the expression of both genes at 24 h, as did inulin at 48 h.  
419 Galactose supplementation also produced a significant increase in expression of *gamM* at 48 h and *gamY*  
420 at 24 and 48 h (Fig. 5c). Other bacteriocin genes did not show notable changes in expression, except for  
421 an increase in expression of the helveticin J-like gene in the presence of starch at 24 h (supplementary  
422 Table S1).

423

424 *In vitro colon model fermentations with L. gasseri LM19*

425 Survival of *L. gasseri* LM19 and *C. perfringens* in an *in vitro* colon model

426 *L. gasseri* LM19 was transformed with a plasmid conferring chloramphenicol resistance to allow  
427 selection and enumeration of this strain within a mixed microbial community. Transformation of  
428 electrocompetent cells gave an efficiency of  $1.07 \times 10^2$  transformants/ng of DNA. Fermentations with  
429 three different faecal donors were performed with four vessels per fermentation inoculated with *L.*  
430 *gasseri* LM19-pUK200, *C. perfringens* NCTC 3110, *L. gasseri* with *C. perfringens*, or a media control.  
431 *L. gasseri* numbers recovered increased from 5.3, 5.22 and 5.22 log<sub>10</sub> cfu/ml in donors 1, 2 and 3,  
432 respectively at 4 h, to 6.12, 6.39 and 6.36 log<sub>10</sub> cfu/ml at 8 h and 7.30, 7.31 and 7.47 log<sub>10</sub> cfu/ml at 24  
433 h. However, after 48 h, levels of recovery dropped to 3.66, 4 and 3.72 log<sub>10</sub> cfu/ml.

434 *C. perfringens* levels were measured by qPCR, which detects DNA from both live and dead cells.  
435 Addition of *L. gasseri* LM19 did not have a negative effect on the *C. perfringens* population in the  
436 fermentation with faecal sample from donor 1; there was a tendency to lower *C. perfringens* counts in  
437 co-culture at 24 h with donors 2 and 3, but the changes were not significant (Fig. 6a).

438

439 Bacteriocin gene expression

440 PCR amplification of cDNA obtained from colon model samples using primers to detect the bacteriocin  
441 genes *bact\_1*, *bact\_2*, *helveticin-J like*, *gamA*, *gamX*, *gamM* and *gamY*, showed detectable levels of  
442 bacteriocin gene expression at 24 h (Fig. 6b). At 48 h, expression of only *helveticin-J like*, *gamM* and  
443 *gamY* genes was detected (data not shown).

444

445 Impact of *L. gasseri* LM19 on gut microbiota composition

446 Analysis of relative abundance at order, family and genus level was conducted. The initial bacterial  
447 composition was, as expected, different between the three donors (Fig. 6c). Bacterial populations from  
448 donor 1 remained relatively stable over 24 h. The addition of *L. gasseri* LM19, *C. perfringens* or both  
449 did not result in a significant increase in proportions of *Lactobacillales* or *Clostridiales*, and all 3  
450 treatments resulted in similar increases in *Bifidobacteriales* and *Coriobacteriales* relative to the control,  
451 with the *L. gasseri* LM19 with *C. perfringens* treatment more similar to the *L. gasseri* LM19 only  
452 condition.

453 The initial population from donor 2 was constituted mainly of *Clostridiales*, with some *Bacteroidales*,  
454 *Coriobacteriales* and *Bifidobacteriales*. A change can be observed at 24 h in both the control and the  
455 samples where *L. gasseri* LM19 or *L. gasseri* LM19 with *C. perfringens* were added, with an increase  
456 in *Lactobacillales* along with a small increase in *Enterobacteriales*. The decrease in relative abundance

457 of *Bifidobacteriales* and *Coriobacteriales* in the control, *L. gasseri* and *C. perfringens* + *L. gasseri*  
458 treatments was statistically significant ( $p < 0.05$ ) and not observed in the *C. perfringens* sample. *C.*  
459 *perfringens* alone appeared to prevent the overgrowth of *Lactobacillales*, while *Clostridiales* were  
460 decreased, being replaced by *Enterobacteriales*, *Bacteroidales*, *Coriobacteriales* and *Bifidobacteriales*.  
461 It was noted that addition of *L. gasseri* LM19 with *C. perfringens* gave a profile with more similarity to  
462 the control or *L. gasseri* LM19 samples.

463 In *L. gasseri* LM19 treatment of donor 3 samples, *Bifidobacteriales* and *Enterobacteriales* increased  
464 over time in a similar way to the control, but *Clostridiales* were almost completely replaced by  
465 *Lactobacillales*. This rise was not as large when the *L. gasseri* LM19 was co-inoculated with *C.*  
466 *perfringens*, while addition of *C. perfringens* alone did not manage to maintain levels of *Clostridiales*,  
467 with increases seen in *Enterobacteriales*, *Bifidobacteriales* and *Lactobacillales*. In this case, the *L.*  
468 *gasseri* LM19 + *C. perfringens* treatment at 24 h was more similar to the control, with the exception of  
469 the presence of *Lactobacillales*, suggesting that the *C. perfringens* effect on the microbial composition  
470 was changed by the inoculation with *L. gasseri*.

471

#### 472 SCFA analysis

473 Increases in the production of formic, acetic, propionic and butyric acids were observed in the three  
474 faecal fermentations in colon model conditions inoculated with *L. gasseri* LM9. However, there was a  
475 high variability in SCFA production between the three donors (Fig. 6d). In donor 1, production of SCFA,  
476 ethanol, succinate and, at 8 h only, lactate was increased compared to the control. In donor 2 there were  
477 notable increases in lactic acid from 4 h. Given the similar relative abundance of *Lactobacillales* (Fig.  
478 6d) in control and *L. gasseri* treatment, this suggests an influence of *L. gasseri* LM19 on the native  
479 microbiota.

480

#### 481 Discussion

482 Here we report the ability of a representative of the human breast milk microbiota to exhibit antagonistic  
483 activity against different enteropathogens via production of previously identified bacteriocins and one  
484 novel bacteriocin. We have observed different carbon sources have an influence on the expression of  
485 these bacteriocin genes. *L. gasseri* LM19 survived and expressed these antimicrobial genes in a complex  
486 faecal environment under simulated colon conditions. This can be considered an important feature, since  
487 not all strains that exhibit probiotic traits are able to survive in colon conditions and, therefore, deliver  
488 their activity *in situ*. Additionally, we have observed other characteristics that are considered useful,  
489 such as the production of SCFA.

490 The presence of bacteria in human breast milk has been reported previously and the existence of a  
491 bacterial entero-mammary pathway has recently been proposed (Rodríguez, 2014). These bacteria might  
492 have a gut origin and that could explain their ability to survive in GI tract conditions and exhibit  
493 antagonistic traits against other gut bacteria such as enteropathogens that might share the same  
494 environment. Gasserins are antimicrobial peptides produced by *L. gasseri*. Several gasserins have  
495 been identified in sets of four, comprising two-peptide class II bacteriocins. K7 bacteriocins are a variant  
496 of acidocins LF221 and share similar sequences to GasT and its complementary peptide GatX,  
497 respectively, while GasE could be considered a variant of GasT. These two-peptide bacteriocins also  
498 show similarities with other two-peptide bacteriocins isolated from species previously grouped with *L.*  
499 *gasseri* (Tahara *et al.*, 1996). *L. gasseri* LM19 also presents two clusters of bacteriocins that show  
500 homology to acidocin LF221A and Gas K7A on one hand and acidocin LF221B and Gas K7B on the  
501 other hand. Additionally, we observed the presence of structural genes corresponding to a new two-  
502 component bacteriocin that show a greater variation in sequence to previously described gasserins.  
503 Partial purification of the products of these structural genes was conducted and we observed the presence  
504 of masses matching the expected size in eluted fractions that exhibited antimicrobial activity.

505 Particularly, masses predicted to match those of the new potential peptides GamM (4124 Da) and GamY  
506 (4105 Da) were associated with antimicrobial activity. Synthetic peptides confirmed the activity of  
507 GamM but GamY did not show activity or synergy with GamM. Synergistic activity was reported  
508 previously between GasT and GatX and between the two components of gassericin S (here Bact\_1 and  
509 Bact\_2), respectively (Kasuga *et al.*, 2019). While Bact\_1 and Bact\_2 showed synergistic activity, the  
510 GasT and GatX homologues from this study, GamA and GamX, did not. However, we could observe a  
511 possible synergistic activity between GamA and Bact\_1.

512 We demonstrated that *L. gasseri* LM19 is able to survive in simulated colon conditions within a complex  
513 faecal microbiota. Moreover, it is capable of expressing the bacteriocin genes in this environment. In  
514 previous work it was demonstrated that another potentially probiotic *L. gasseri*, strain K7, which  
515 produced 2 two-peptide bacteriocins K7 A, K7 A (cf), K7 B and K7 B (cf), was able to survive in faecal  
516 samples. Its bacteriocins were also the focus of examination by conventional PCR and RT-PCR (Treven  
517 *et al.*, 2013). In that instance the authors noted that bacteriocin genes were amplified by PCR from other  
518 LAB species present in the environment. However, in our controls and treatments where *L. gasseri*  
519 LM19 was not present, no PCR products were detected.

520 *L. gasseri* LM19 showed mixed effects on a strain of *C. perfringens* added to faecal fermentations of  
521 three different donors, causing a slight decrease in *C. perfringens* in only 2 out of 3 fermentations. This  
522 might indicate that the surrounding microbiota plays a synergistic or antagonistic role on the effect of  
523 *L. gasseri* LM19. However, it should be noted that in antimicrobial assays *C. perfringens* was only  
524 inhibited by *L. gasseri* LM19 cells, not cell-free supernatant, which might suggest that they should be  
525 in close proximity for an antimicrobial effect. However, co-inoculation of *L. gasseri* LM19 with *C.*  
526 *perfringens* did seem to alter the effect of *C. perfringens* on the background microbiota. In all three  
527 donors, the profiles seen after addition of *L. gasseri* LM19 with *C. perfringens* were more similar to  
528 instances where *L. gasseri* was added alone or control samples than to samples containing only *C.*  
529 *perfringens*.

530 Colon model fermentations also allowed the production of formic, acetic, propionic and butyric acids to  
531 be quantified using NMR. We observed an increase in SCFA production in the faecal fermentation of  
532 the three donors. However, as with the microbial composition, the amount of each SCFA produced was  
533 very different from one donor to another, which might be related to production by other members of the  
534 microbiota that varied between the three donors. In a previous study of consumption of a beverage  
535 prepared with *L. gasseri* CP2305, the stools of the participants presented an increased level of SCFA  
536 too, while the microbiota experienced some alterations, including an increase in the presence of bacteria  
537 from *Clostridium* cluster IV, known for producing higher amounts of SCFA (Sawada *et al.*, 2016). The  
538 authors of that study could not conclude if the increase of SCFA was due to the effect of *L. gasseri* or  
539 due to the proliferation of bacteria that produced more SCFA. SCFA production also depends on diet  
540 and availability of nutrients in the gastrointestinal tract as well as the resident microbiota (den Besten *et*  
541 *al.*, 2013; Holmes *et al.*, 2017).

542 This work shows the ability of *L. gasseri* LM19, a multi-bacteriocin breast milk isolate, to survive in  
543 colon conditions. Its ability to express different bacteriocin genes, including a novel gassericin M, under  
544 these conditions, makes it a candidate for further application studies.

545

#### 546 **Acknowledgements**

547 The authors would like to thank Dr. Lee Kellingray for training in the colon model system and Dr.  
548 Lizbeth Sayavedra, Dr. Maria Diaz-Garcia, Dr. Bhavika Parmanand and Saskia Neuert for training in  
549 QIIME2.

550

#### 551 **Funding information**



552 The authors are grateful for funding from Walsh Fellowship Project 2015066 (EG-G) and BBSRC  
553 Institute Strategic Programme Grant BB/R012490/1 (Quadram Institute Biosciences, MJM and AN).  
554 Research in the Cotter lab is also supported by SFI; PI award “Obesibiotics” (SFI/11/PI/1137) and centre  
555 grant “APC Microbiome Institute” (SFI/12/RC/2273).

556

#### 557 **Conflict of interest**

558 The authors declare that they have no conflicts of interest.

559

#### 560 **Ethical statement**

561 Faecal samples were provided by different donors, from a study approved by the QIB Human Research  
562 Governance committee (IFR01/2015) registered at <http://www.clinicaltrials.gov> (NCT02653001). The  
563 participants provided their written informed consent to participate in this study.

564

#### 565 **References**

566

567 Abramov V, Khlebnikov V, Kosarev I, Bairamova G, Vasilenko R, Suzina N, Machulin A, Sakulin V,  
568 Kulikova N, Vasilenko N, Karlyshev A, Uversky V, Chikindas ML and Melnikov V (2014).  
569 Probiotic properties of *Lactobacillus crispatus* 2,029: Homeostatic interaction with  
570 cervicovaginal epithelial cells and antagonistic activity to genitourinary pathogens. *Probiotics*  
571 *Antimicro* 6: 165-176. <https://doi.org/10.1007/s12602-014-9164-4>

572 Altschul SF, Gish W, Miller W, Myers EW, Lipman DJ. (1990) Basic local alignment search tool. *J*  
573 *Mol Biol* 215: 403-10. [https://doi.org/10.1016/S0022-2836\(05\)80360-2](https://doi.org/10.1016/S0022-2836(05)80360-2)

574 Balouiri M, Sadiki M and Ibnsouda SK (2016) Methods for in vitro evaluating antimicrobial activity: A  
575 review. *J Pharm Anal* 6: 71-79. <http://dx.doi.org/10.1016/j.jpha.2015.11.005>

576 Bankevich A, Nurk S, Antipov D, Gurevich AA, Dvorkin M, Kulikov AS, Lesin VM, Nikolenko SI,  
577 Pham S, Prjibelski AD, Pyshkin AV, Sirotkin AV, Vyahhi N, Tesler G, Alekseyev MA and  
578 Pevzner PA (2012) SPAdes: A new genome assembly algorithm and its applications to single-  
579 cell sequencing. *J Comput Biol* 19: 455-477. <https://doi.org/10.1089/cmb.2012.0021>

580 Bogovic-Matijasic B, Rogelj I, Nes IF and Holo H (1998) Isolation and characterization of two  
581 bacteriocins of *Lactobacillus acidophilus* LF221. *Appl Microbiol Biot* 49: 606-612.

582 Bokulich NA, Kaehler BD, Rideout JR, Dillon M, Bolyen E, Knight R, Huttley GA and Gregory  
583 Caporaso (2018) Optimizing taxonomic classification of marker-gene amplicon sequences with  
584 QIIME 2’s q2-feature-classifier plugin. *Microbiome* 6: 90. <https://doi.org/10.1186/s40168-018-0470-z>

586 Bolger AM, Lohse M and Usadel B (2014) Trimmomatic: a flexible trimmer for Illumina sequence data.  
587 *Bioinformatics* 30: 2114-2120. <https://doi.org/10.1093/bioinformatics/btu170>

588 Brettin T, Davis JJ, Disz T, Edwards RA, Gerdes S, Olsen GJ, Olson R, Overbeek R, Parrello B, Pusch  
589 GD, Shukla M, Thomason JA, Stevens R, Vonstein V, Wattam AR and Xia F (2015) RASTtk:  
590 A modular and extensible implementation of the RAST algorithm for building custom  
591 annotation pipelines and annotating batches of genomes. *Sci Rep* 5: 8365.  
592 <https://doi.org/10.1038/srep08365>

593 Carver T, Harris SR, Berriman M, Parkhill J and McQuillan JA (2012) Artemis: an integrated platform  
594 for visualization and analysis of high-throughput sequence-based experimental data.  
595 *Bioinformatics* 28: 464-469. <https://doi.org/10.1093/bioinformatics/btr703>

596 Collins FWJ, O’Connor PM, O’Sullivan O, Gómez-Sala B, Rea MC, Hill C and Ross RP (2017)  
597 Bacteriocin gene-trait matching across the complete *Lactobacillus* pan-genome. *Sci Rep* 7:  
598 3481. <https://doi.org/10.1038/s41598-017-03339-y>

- 599 Cotter PD, Ross RP and Hill C (2013) Bacteriocins - a viable alternative to antibiotics? *Nat Rev*  
600 *Microbiol* 11: 95-105. <https://doi.org/10.1038/nrmicro2937>
- 601 Czárán TL, Hoekstra RF and Pagie L (2002) Chemical warfare between microbes promotes biodiversity.  
602 *P Natl Acad Sci* 99: 786-790. <https://doi.org/10.1073/pnas.012399899>
- 603 den Besten G, van Eunen K, Groen AK, Venema K, Reijngoud D-J and Bakker BM (2013) The role of  
604 short-chain fatty acids in the interplay between diet, gut microbiota, and host energy  
605 metabolism. *J Lipid Res* 54: 2325-2340. <https://doi.org/10.1194/jlr.R036012>
- 606 Field D, Cotter PD, Hill C and Ross RP (2015) Bioengineering lantibiotics for therapeutic success. *Front*  
607 *Microbiol* 6. <https://doi.org/10.3389/fmicb.2015.01363>
- 608 Fujisawa T, Benno Y, Yaeshima T and Mitsuoka T (1992) Taxonomic study of the *Lactobacillus*  
609 *acidophilus* group, with recognition of *Lactobacillus gallinarum sp nov* and *Lactobacillus*  
610 *johnsonii sp nov* and synonymy of *Lactobacillus acidophilus* group A3 (Johnson et al 1980)  
611 with the type strain of *L. amylovorus* (Nakamura 1981). *Int J Syst Bacteriol* 42: 487-491.
- 612 Garcia-Gutierrez E, Mayer MJ, Cotter PD and Narbad A (2018) Gut microbiota as a source of novel  
613 antimicrobials. *Gut Microbes*: 1-21. <https://doi.org/10.1080/19490976.2018.1455790>
- 614 Hegarty JW, Guinane CM, Ross RP, Hill C and Cotter PD (2016) Bacteriocin production: a relatively  
615 unharnessed probiotic trait? *F1000Research* 5: 2587.  
616 <https://doi.org/10.12688/f1000research.9615.1>
- 617 Holmes AJ, Chew YV, Colakoglu F, Cliff JB, Klaassens E, Read MN, Solon-Biet SM, McMahon AC,  
618 Cogger VC, Ruohonen K, Raubenheimer D, Le Couteur DG and Simpson SJ (2017) Diet-  
619 microbiome interactions in health are controlled by intestinal nitrogen source constraints. *Cell*  
620 *Metab* 25: 140-151. <https://doi.org/10.1016/j.cmet.2016.10.021>
- 621 Holo H and Nes IF (1989) High-frequency transformation, by electroporation, of *Lactococcus lactis*  
622 subsp. *cremoris* grown with glycine in osmotically stabilized media. *Appl Environ Microb* 55:  
623 3119-3123.
- 624 Joerger MC and Klaenhammer TR (1986) Characterization and purification of helveticin J and evidence  
625 for a chromosomally determined bacteriocin produced by *Lactobacillus helveticus* 481. *J*  
626 *Bacteriol* 167: 439-446.
- 627 Karska-Wysocki B, Bazo M and Smoragiewicz W (2010) Antibacterial activity of *Lactobacillus*  
628 *acidophilus* and *Lactobacillus casei* against methicillin-resistant *Staphylococcus aureus*  
629 (MRSA). *Microbiol Res* 165: 674-686. <http://dx.doi.org/10.1016/j.micres.2009.11.008>
- 630 Kasuga G, Tanaka M, Harada Y, Nagashima H, Yamato T, Wakimoto A, Arakawa K, Kawai Y, Kok J  
631 and Masuda T (2019). Homologous expression and characterization of gassericin T and  
632 gassericin S, a novel class IIb bacteriocin produced by *Lactobacillus gasseri* LA327. *Appl*  
633 *Environ Microb* 85: e02815-02818. <https://doi.org/10.1128/AEM.02815-18>
- 634 Kawai Y, Saito T, Toba T, Samant K and Itoh, T (1994) Isolation and characterization of a highly  
635 hydrophobic new bacteriocin (gassericin A) from *Lactobacillus gasseri* LA39. *Bioscience,*  
636 *Biotechnology, and Biochemistry* 58: 1218-1221. <https://doi.org/10.1271/bbb.58.1218>
- 637 Kawai Y, Saitoh B, Takahashi O, Kitazawa H, Saito T, Nakajima H and Itoh T (2000) Primary amino  
638 acid and DNA sequences of gassericin T, a lactacin F-family bacteriocin produced by  
639 *Lactobacillus gasseri* SBT2055. *Bioscience, Biotechnology, and Biochemistry* 64: 2201-2208.  
640 <https://doi.org/10.1271/bbb.64.2201>
- 641 Kelsic ED, Zhao J, Vetsigian K and Kishony R (2015) Counteraction of antibiotic production and  
642 degradation stabilizes microbial communities. *Nature* 521: 516-519.  
643 <https://doi.org/10.1038/nature14485>
- 644 Kim PI, Jung MY, Chang, Y-H, Kim S, Kim S-J and Park Y-H (2007) Probiotic properties of  
645 *Lactobacillus* and *Bifidobacterium* strains isolated from porcine gastrointestinal tract. *Appl*  
646 *Microbiol Biot* 74: 1103-1111. <https://doi.org/10.1007/s00253-006-0741-7>

- 647 Ladero V, Coton M, Fernández M, Buron N, Martín MC, Guichard H, Coton E and Alvarez MA (2011)  
648 Biogenic amines content in Spanish and French natural ciders: Application of qPCR for  
649 quantitative detection of biogenic amine-producers. *Food Microbiol* 28: 554-561.  
650 <https://doi.org/10.1016/j.fm.2010.11.005>
- 651 LeBlanc JG, Chain F, Martín R, Bermúdez-Humarán LG, Courau S and Langella P (2017) Beneficial  
652 effects on host energy metabolism of short-chain fatty acids and vitamins produced by  
653 commensal and probiotic bacteria. *Microb Cell Fact* 16: 79-79. <https://doi.org/10.1186/s12934-017-0691-z>
- 655 Lewis K (2013) Platforms for antibiotic discovery. *Nat Rev Drug Discov* 12: 371-387.  
656 <https://doi.org/10.1038/nrd3975>
- 657 Li H and Durbin R (2010) Fast and accurate long-read alignment with Burrows-Wheeler transform.  
658 *Bioinformatics* 26: 589-595. <https://doi.org/10.1093/bioinformatics/btp698>
- 659 Li H, Handsaker B, Wysoker A, Fennell T, Ruan J, Homer N, Marth G, Abecasis G, Durbin R and  
660 Genome Project Data Processing S (2009) The sequence alignment/map format and SAMtools.  
661 *Bioinformatics* 25: 2078-2079. <https://doi.org/10.1093/bioinformatics/btp352>
- 662 Majhenič AČ, Venema K, Allison GE, Matijašić BB, Rogelj I and Klaenhammer TR (2004) DNA  
663 analysis of the genes encoding acidocin LF221 A and acidocin LF221 B, two bacteriocins  
664 produced by *Lactobacillus gasseri* LF221. *Appl Microbiol Biotec* 63: 705-714.  
665 <https://doi.org/10.1007/s00253-003-1424-2>
- 666 Maldonado-Barragán A, Caballero-Guerrero B, Martín V, Ruiz-Barba JL and Rodríguez JM (2016)  
667 Purification and genetic characterization of gassericin E, a novel co-culture inducible  
668 bacteriocin from *Lactobacillus gasseri* EV1461 isolated from the vagina of a healthy woman.  
669 *BMC Microbiol* 16: 37. <https://doi.org/10.1186/s12866-016-0663-1>
- 670 Mavrič A, Tompa G, Trmčić A, Rogelj I and Bogovič Matijašić B (2014) Bacteriocins of *Lactobacillus*  
671 *gasseri* K7 – Monitoring of gassericin K7 A and B genes' expression and isolation of an active  
672 component. *Process Biochem* 49: 1251-1259. <http://dx.doi.org/10.1016/j.procbio.2014.04.022>
- 673 Nagpal R, Ogata K, Tsuji H, Matsuda K, Takahashi T, Nomoto K, Suzuki Y, Kawashima K, Nagata S  
674 and Yamashiro Y (2015) Sensitive quantification of *Clostridium perfringens* in human feces by  
675 quantitative real-time PCR targeting alpha-toxin and enterotoxin genes. *BMC Microbiol* 15:  
676 219-219. <https://doi.org/10.1186/s12866-015-0561-y>
- 677 Pandey N, Malik RK, Kaushik JK and Singroha G (2013) Gassericin A: a circular bacteriocin produced  
678 by Lactic acid bacteria *Lactobacillus gasseri*. *W J Microbiol Biot* 29: 1977-1987.  
679 <https://doi.org/10.1007/s11274-013-1368-3>
- 680 Parmanand BA, Kellingray L, Le Gall G, Basit AW, Fairweather-Tait S and Narbad A (2019) A decrease  
681 in iron availability to human gut microbiome reduces the growth of potentially pathogenic gut  
682 bacteria; an *in vitro* colonic fermentation study. *The Journal of Nutritional Biochemistry*.  
683 <https://doi.org/10.1016/j.jnutbio.2019.01.010>
- 684 Quinlan AR and Hall IM (2010) BEDTools: a flexible suite of utilities for comparing genomic features.  
685 *Bioinformatics* 26: 841-842. <https://doi.org/10.1093/bioinformatics/btq033>
- 686 Rodríguez JM (2014) The origin of human milk bacteria: is there a bacterial entero-mammary pathway  
687 during late pregnancy and lactation? *Adv Nutr* 5: 779-784.  
688 <https://doi.org/10.3945/an.114.007229>
- 689 Sarmiento-Rubiano L-A, Berger B, Moine D, Zúñiga M, Pérez-Martínez G and Yebra MJ (2010)  
690 Characterization of a novel *Lactobacillus* species closely related to *Lactobacillus johnsonii*  
691 using a combination of molecular and comparative genomics methods. *BMC Genomics* 11: 504.  
692 <https://doi.org/10.1186/1471-2164-11-504>
- 693 Sawada D, Sugawara T, Ishida Y, Aihara K, Aoki Y, Takehara I, Takano K and Fujiwara S (2016) Effect  
694 of continuous ingestion of a beverage prepared with *Lactobacillus gasseri* CP2305 inactivated

- 695 by heat treatment on the regulation of intestinal function. *Food Res Int* 79: 33-39.  
696 <https://doi.org/10.1016/j.foodres.2015.11.032>
- 697 Seemann T (2014) Prokka: rapid prokaryotic genome annotation. *Bioinformatics* 30: 2068-2069.  
698 <https://doi.org/10.1093/bioinformatics/btu153>
- 699 Selle K and Klaenhammer TR (2013) Genomic and phenotypic evidence for probiotic influences of  
700 *Lactobacillus gasseri* on human health. *FEMS Microbiol Rev* 37: 915-935.  
701 <https://doi.org/10.1111/1574-6976.12021>
- 702 Singh A, Vishwakarma V and Singhal B (2018) Metabiotics: The functional metabolic signatures of  
703 probiotics: Current state-of-art and future research priorities *Metabiotics: Probiotics effector*  
704 *molecules. Adv Biosci Biotech* 04: 43. <https://doi.org/10.4236/abb.2018.94012>
- 705 Tada I, Tanizawa Y, Endo A, Tohno M and Arita M (2017) Revealing the genomic differences between  
706 two subgroups in *Lactobacillus gasseri*. *Bioscience of Microbiota, Food and Health* 36: 155-  
707 159. <https://doi.org/10.12938/bmfh.17-006>
- 708 Tahara T, Oshimura M, Umezawa C and Kanatani K (1996) Isolation, partial characterization, and mode  
709 of action of acidocin J1132, a two-component bacteriocin produced by *Lactobacillus*  
710 *acidophilus* JCM 1132. *Appl Environ Microb* 62: 892-897.
- 711 Tahara T, Yoshioka S, Utsumi R and Kanatani K (1997) Isolation and partial characterization of  
712 bacteriocins produced by *Lactobacillus gasseri* JCM 2124. *FEMS Microbiol Lett* 148: 97-100.  
713 <https://doi.org/10.1111/j.1574-6968.1997.tb10273.x>
- 714 Treven P, Turkova K, Trmčić A, Obermajer T, Rogelj I and Matijašić BB (2013) Detection and  
715 quantification of probiotic strain *Lactobacillus gasseri* K7 in faecal samples by targeting  
716 bacteriocin genes. *Folia Microbiol* 58: 623-630. <https://doi.org/10.1007/s12223-013-0252-8>
- 717 van Heel AJ, de Jong A, Montalban-Lopez M, Kok J and Kuipers OP (2013) BAGEL3: automated  
718 identification of genes encoding bacteriocins and (non-)bactericidal posttranslationally  
719 modified peptides. *Nucleic Acids Res* 41: W448-W453. <https://doi.org/10.1093/nar/gkt391>
- 720 Weber T, Blin K, Duddela S, Krug D, Kim HU, Bruccoleri R, Lee SY, Fischbach MA, Müller R,  
721 Wohlleben W, Breitling R, Takano E and Medema MH (2015) antiSMASH 3.0—a  
722 comprehensive resource for the genome mining of biosynthetic gene clusters. *Nucleic Acids*  
723 *Res* 43: W237-W243. <https://doi.org/10.1093/nar/gkv437>
- 724 Wegmann U, Klein JR, Drumm I, Kuipers OP and Henrich B (1999) Introduction of peptidase genes  
725 from *Lactobacillus delbrueckii* subsp. *lactis* into *Lactococcus lactis* and controlled expression.  
726 *Appl Environ Microb* 65: 4729-4733.
- 727 Yamano T, Iino H, Takada M, Blum S, Rochat F and Fukushima Y (2007) Improvement of the human  
728 intestinal flora by ingestion of the probiotic strain *Lactobacillus johnsonii* La1. *Brit J Nutr* 95:  
729 303-312. <https://doi.org/10.1079/BJN20051507>
- 730 Zorič Peternel M, Čanžek Majhenič A, Holo H, Nes IF, Salehian Z, Berlec A and Rogelj I (2010) Wide-  
731 inhibitory spectra bacteriocins produced by *Lactobacillus gasseri* K7. *Probiotics Antimicro* 2:  
732 233-240. <https://doi.org/10.1007/s12602-010-9044-5>

733

734

735

736

737

738



739

740 **List of tables**

741 **Table 1** Primers for qRT-PCR studies in *L. gasseri* LM19 and detection of *C. perfringens*.

| Gene                            | Primer        | Sequence (5'-3')          | Product size | Reference                     |
|---------------------------------|---------------|---------------------------|--------------|-------------------------------|
| <i>gyrase A L. gasseri</i> LM19 | LGgyrAF       | TTGATTGCCTTAACCCTTCG      | 136          | This work                     |
|                                 | LGgyrAR       | TTCCATTGAACGAACATCA       |              |                               |
| <i>bact_1</i>                   | Cluster 1.1F  | TATTGGTGCATGGAGAGGTG      | 124          | This work                     |
|                                 | Cluster 1.1R  | CCAGCCCACACATTGTACTG      |              |                               |
| <i>bact_2</i>                   | Cluster1.2F   | TTGGGGTAGTGTTCAGGAT       | 97           | This work                     |
|                                 | Cluster1.2R   | TGATGTTGCAGCTCCGTTAG      |              |                               |
| Helveticin J-like               | Cluster2F     | CTGGGTACAAAGCGGAGAA       | 176          | This work                     |
|                                 | Cluster2R     | GCCTGCTCGGTTAAGATAAG      |              |                               |
| <i>gamA</i> (=gasT)             | Cluster3.1F   | CTGGATGGGCTCTTGAAAT       | 112          | This work                     |
|                                 | Cluster3.1R   | TTTCCGAATCCACCAGTAGC      |              |                               |
| <i>gamX</i> (=gatX)             | Cluster3.2F   | TGGGGGAATGCTGTAATAGG      | 100          | This work                     |
|                                 | Cluster3.2R   | CTCCTAAGCCACAGGCAGTC      |              |                               |
| <i>gamY</i>                     | GamYF         | ACTCAAATCGTAGGAGGAAAAGG   | 150          | This work                     |
|                                 | GamY R        | AAAGCATGCACCTGAACCA       |              |                               |
| <i>gamM</i>                     | GasM F        | AGCAGGAGGAGCATTTCAA       | 90           | This work                     |
|                                 | GasM R        | CCTGCTGCACCACCTAAAAT      |              |                               |
| Immunity gene <i>gamI3</i>      | Cluster 3.3 F | CAGATGAAGAAGCATTACTTGAAAA | 102          | This work                     |
|                                 | Cluster 3.3 R | TTCCAGGCCAAGTATTAGTTGTA   |              |                               |
| <i>C. perfringens</i>           | s-Clper-F     | GGGGGTTTCAACACCTCC        | 170          | (Nagpal <i>et al.</i> , 2015) |
|                                 | CIPER-R       | GCAAGGGATGTCAAGTGT        |              |                               |

742

743 **Table 2** Summary of inhibitory activity of *L. gasseri* LM19 using different techniques

744

|                                 | Overlay | Cross-streak | Drop test | Filter disc | Well-diffusion |
|---------------------------------|---------|--------------|-----------|-------------|----------------|
| <i>S. enterica</i> LT2          | -       | -            | -         | -           | -              |
| <i>E. coli</i> ATCC 25922       | -       | -            | -         | -           | -              |
| <i>C. sakazakii</i> NCTC 11467  | -       | ++           | -         | -           | -              |
| <i>C. perfringens</i> NCTC 3110 | +       | +            | -         | -           | -              |
| <i>L. innocua</i> NCTC 11288    | -       | ++           | -         | -           | -              |
| <i>L. bulgaricus</i> 5583       | +++     | +++          | -         | ++          | +++            |
| <i>C. jejuni</i> NCTC 11168     | np      | np           | np        | +           | np             |
| <i>M. luteus</i> FII0640        | -       | ++           | -         | +           | -              |

745

746 -, No activity; +, 1 mm radius inhibition zone; ++, 1-5 mm radius inhibition zone; +++, >5 mm

747 inhibition zone; np, not performed

748

**Table 3** Bacteriocins described in *L. gasseri*.

| Gasserici n                  | Amino acid sequence                                                                       | Molecular mass (Da) | Reference                                                 |
|------------------------------|-------------------------------------------------------------------------------------------|---------------------|-----------------------------------------------------------|
| A                            | <b>MIEKVSKNELSRIYGGNNVNWGSVAGSCGKGAVMGIYFGNPILGCANGAATSLVLQTASGIYKNYQKKR</b>              | 5652                | (Kawai <i>et al.</i> , 1994; Pandey <i>et al.</i> , 2013) |
| B1                           | (N-terminal) NPKVAHCASQIGRSTAWGAVSGAATGTAVGQAVGA-X                                        | 6217                | (Tahara <i>et al.</i> , 1997)                             |
| B2                           | (N-terminal) MISKPEKNTLRL-X                                                               | 4400                | (Tahara <i>et al.</i> , 1997)                             |
| B3                           | (N-terminal) GNPKVAHCASQIGRSTAW-X                                                         | 6273                | (Tahara <i>et al.</i> , 1997)                             |
| B4                           | (N-terminal) NPKVAHCASQIGRSTAW-X                                                          | 5829                | (Tahara <i>et al.</i> , 1997)                             |
| GatX                         | <b>MALKTLEKHELNRNVMGGNKWGNVIGAAATGATRGVSWCRGFGPWGMTACGLGGA AIGGYLGYKSN</b>                | 4763                | (Mavrič <i>et al.</i> , 2014)                             |
| Acidocin LF221A $\alpha$     | <b>MIEKVSKNELSRIYGGNNVNWGSVAGSCGKGAVMEIYFGNPILGCANGAATSLVLQTASGIYKNYQKKR</b>              | 3393                | (Bogovic-Matijasic <i>et al.</i> , 1998)                  |
| Acidocin LF221A $\beta$ (cf) | <b>MKVLNECQLQTVVGGKNWSVAKCGGTIGT NIAIGAWRGARAGSFFGQPVS VGTGALIGASAGAIGGSVQC VGWLAGGGR</b> | 5523                | (Bogovic-Matijasic <i>et al.</i> , 1998)                  |
| Acidocin LF221B $\alpha$     | <b>MALKTLEKHELNRNVMGGNKWGNVIGAAATGATRGVSWCRGFGPWGMTACALGGA AIGGYLGYKSN</b>                | 3393                | (Bogovic-Matijasic <i>et al.</i> , 1998)                  |
| Acidocin LF221B $\beta$      | <b>MKNFNTLSFETLANIVGGRNWAANIGGVGGATVAGWALGNAVCGPACGFVGAHYVPIAWAGVTAATG GFGKIRK</b>        | 5542                | (Bogovic-Matijasic <i>et al.</i> , 1998)                  |

|                |                                                                                              |      |                                           |
|----------------|----------------------------------------------------------------------------------------------|------|-------------------------------------------|
| K7 A           | <b>MIEKVSKNELSRIYGGNNVNWGSVAGSCGKGAVMEIYFGNPILGCANGAATSLVLQTASGIYKNYQKKR</b>                 | 5523 | (Zorič Peternel <i>et al.</i> , 2010)     |
| K7 A (cf)      | <b>MKVLNECQLQTVVGGKNWSVAKCGGTIGTNTNIAIGAWRGARAGSFFGQPVSVGTGALIGASAGAIGGSVQC</b><br>VGWLAGGGR | 3393 | (Zorič Peternel <i>et al.</i> , 2010)     |
| K7 B           | <b>MALKTLEKHELNRNVMGGNKWGNVIGAAATGATRGVSWCRGFGPWGMTACALGGA AIGGYLGYKSN</b>                   | 4777 | (Zorič Peternel <i>et al.</i> , 2010)     |
| K7 B (cf)      | <b>MKNFNTLSFETLANIVGGRNNAANIGGAGGATVAGWALGNAVCGPACGFVGAHYVPIAWAGVTAATG</b><br>GFGKIRK        | 5542 | (Zorič Peternel <i>et al.</i> , 2010)     |
| GasE           | <b>MKNFNTLSFETLANIVGGRNNLAANIGGVGGATVAGWALGNAVCGPACGFVGAHYVPIAWAGVTAATGG</b><br>FGKIRK       | 5469 | (Maldonado-Barragán <i>et al.</i> , 2016) |
| GamA (=GasT)   | <b>MKNFNTLSFETLANIVGGRNNAANIGGVGGATVAGWALGNAVCGPACGFVGAHYVPIAWAGVTAATG</b><br>GFGKIRK        | 5542 | This work, (Kawai <i>et al.</i> , 2000)   |
| GamX (=GaeX)   | <b>MALKTLEKHELNRNVMGGNKWGNVIGAAATGATRGVSWCRGFGPWGMTACGLGGA AIGGYLGYKSN</b>                   | 4763 | This work                                 |
| Bact_1 (=GasS) | <b>MKVLNECQLQTVVGGKNWSVAKCGGTIGTNTNIAIGAWRGARAGSFFGQPVSVAGALIGASAGAIGGSVQC</b><br>VGWLAGGGR  | 6060 | This work, (Kasuga <i>et al.</i> , 2019)  |
| Bact_2 (=GasX) | <b>MIEKVSKNELSRIYGGNNVNWGSVAGSCGKGAVMGIYFGNPILGCANGAATSLVLQTASGIYKNYQKKR</b>                 | 5451 | This work, (Kasuga <i>et al.</i> , 2019)  |
| GamY           | <b>MKTLNEQELTQIVGGKGNKGINWANVRCASAVTIGALGGGLAGPGGMVGGFLLGSGACF</b>                           | 4105 | This work                                 |
| GamM           | <b>MRKINKEELVEITGGFNAAKCAVGTAGGAFSARGSAAFGVPGMVIGGILGGAAGALASCK</b>                          | 4124 | This work                                 |

750 X, sequence not available; cf, complemental factor; leader sequences are marked in bold where known.

751

752

753  
754  
755  
756

**List of Figures**

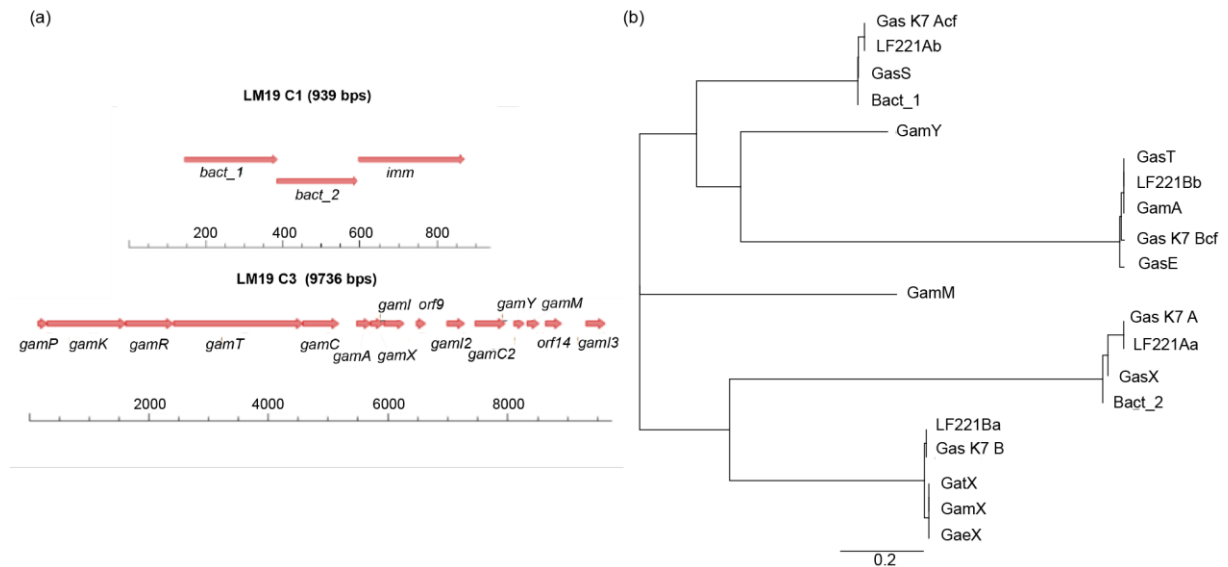

757  
758  
759  
760  
761

**Fig.1 a** Cluster LM19 C1, encoding Bact\_1 and Bact\_2, and Cluster LM19 C3 encoding GamA, GamX, GamY and GamM; **b** Phylogenetic tree of the amino acid sequences of putative bacteriocins identified in *L. gasseri* LM19 in context with the other class IIb gasseritoxins.

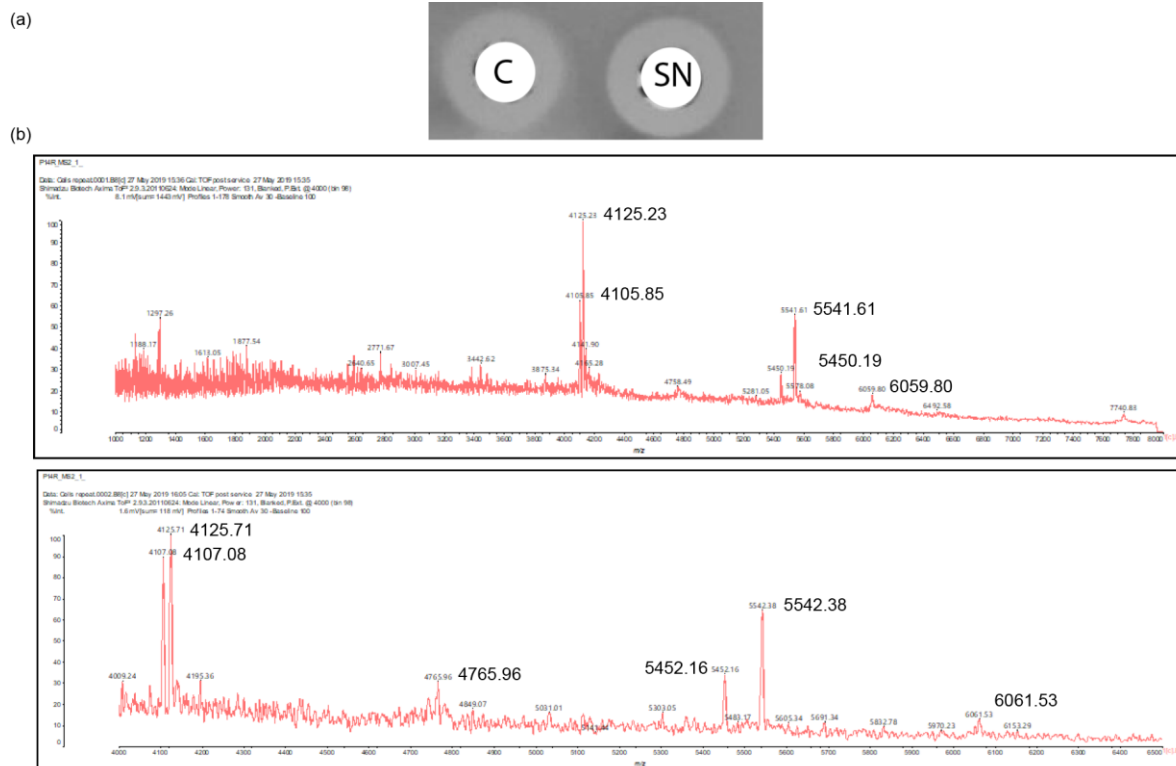

762  
763  
764

**Fig. 2 a** Test for antimicrobial activity of cell (C) and supernatant (SN) fractions of *L. gasseri* LM19 culture; **b** Mass spectra showing peptide masses of interest in the cell extracts.





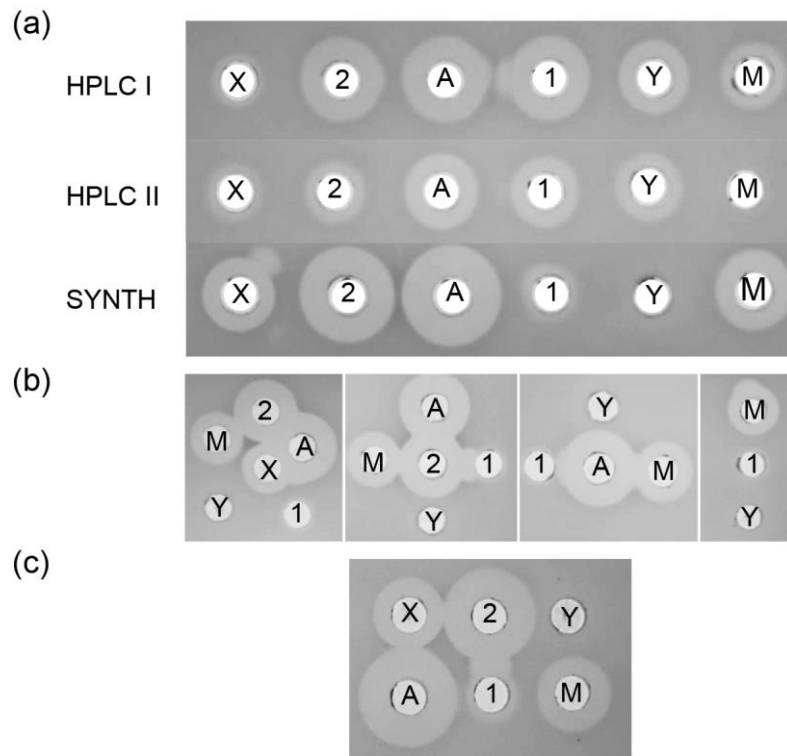

770

771 **Fig.4 a** Activity of GamX, (X); Bact\_2, (2); GamA, (A); Bact\_1, (1); GamY (Y); GamM, (M) from  
772 HPLC runs I and II containing putative peptide masses and synthetic peptides; **b** Synergy between the  
773 different peptides; **c** Synergy between pairs of peptides.

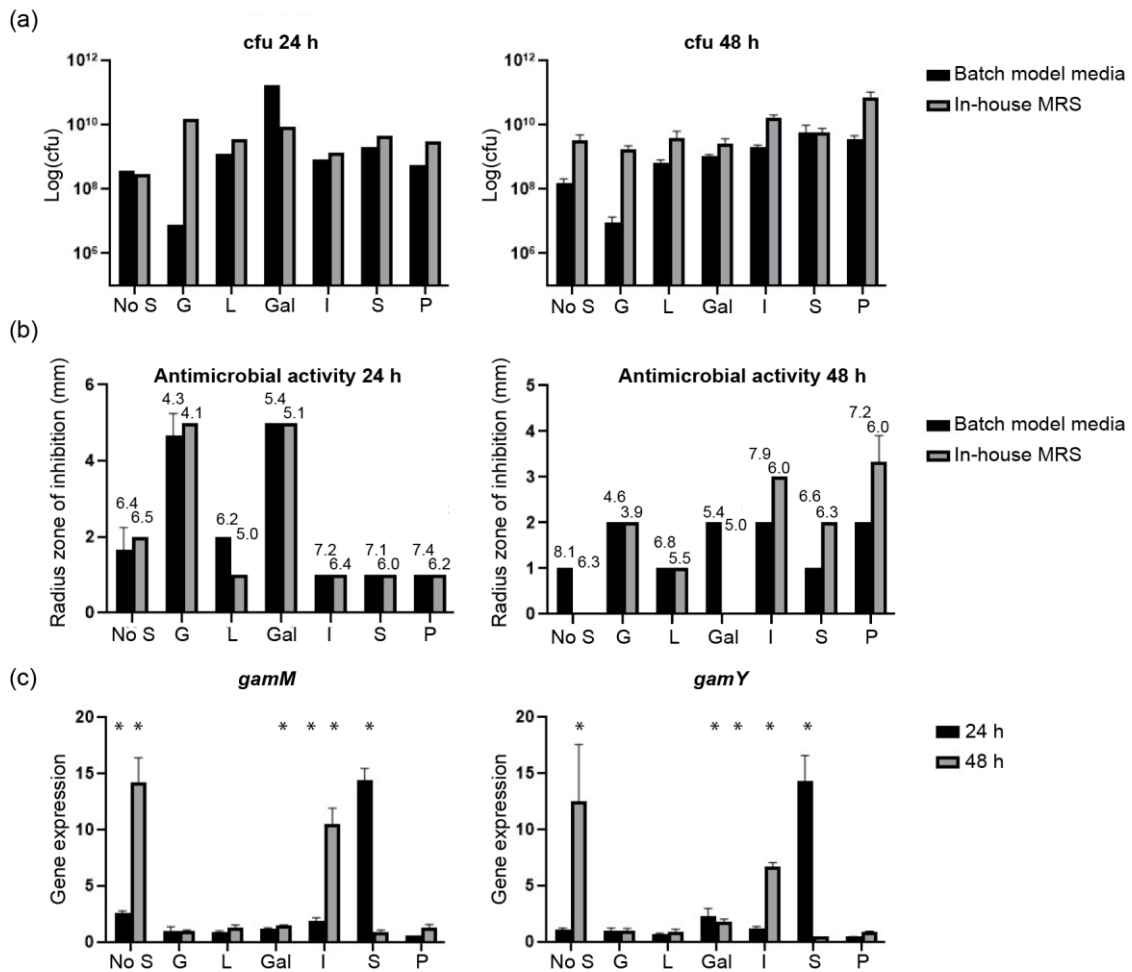

774

775

776

777

778

779

780

781

**Fig. 5 a** Cfu of *L. gasseri* LM19 recovered when grown in batch model media or home-made MRS supplemented with different carbon sources; **b** Antimicrobial activity of cultures in **a** measured by well diffusion assay (Figures above bars indicate mean pH); **c** Gene expression levels of *gamM* and *gamY* after *L. gasseri* LM19 was cultured in home-made MRS supplemented with different carbon sources. No S, no supplementation; G, glucose; L, lactose; Gal, galactose; I, inulin; S, starch and P, pectin; \*, significant difference to glucose supplementation ( $p < 0.05$ ). Results are the mean of triplicate measurements +/- standard deviation.

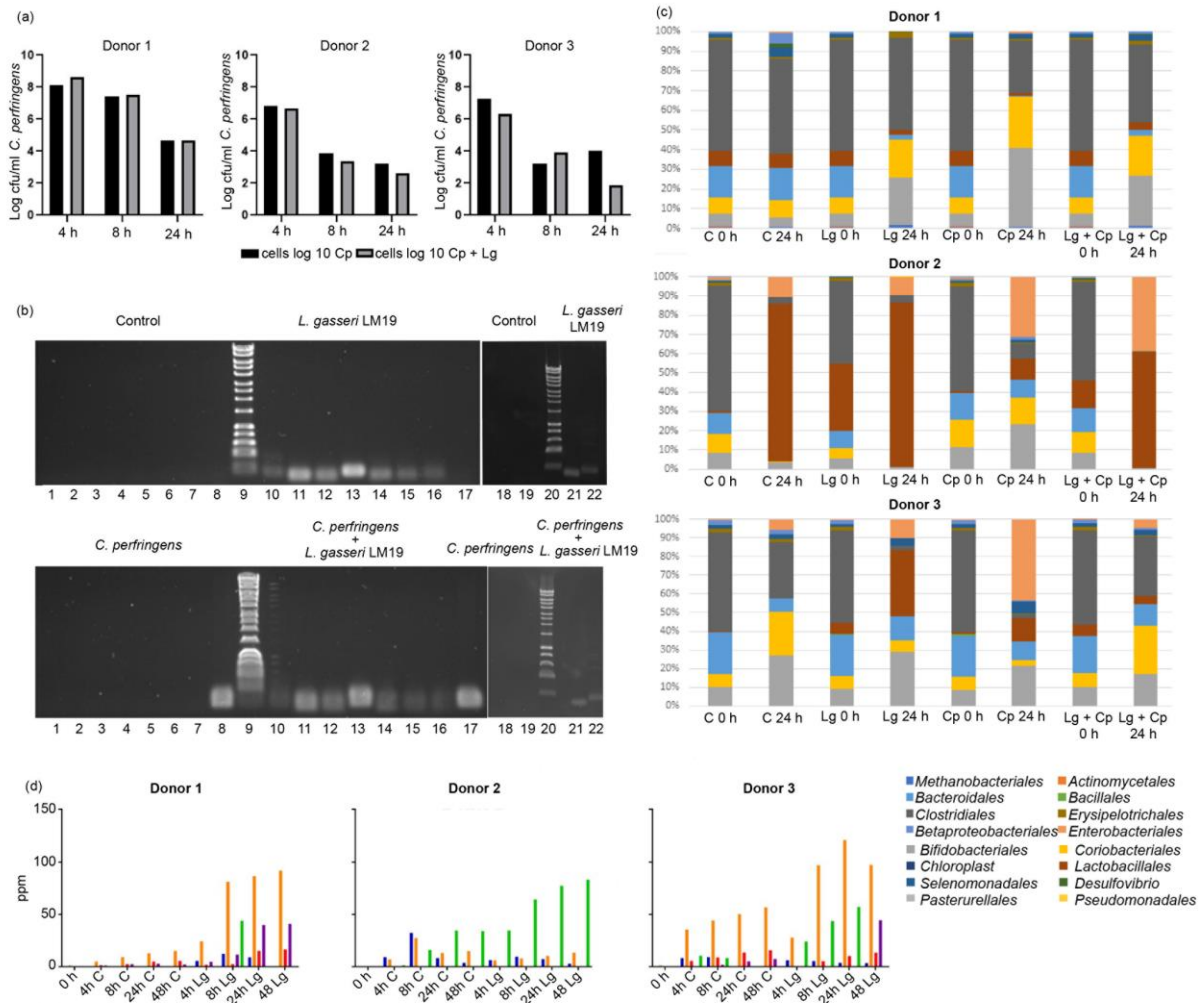

782  
783  
784  
785  
786  
787  
788  
789

**Fig. 6 a** *C. perfringens* NCTC 3110 population in the presence of *L. gasseri* LM19 in three different faecal fermentations; **b** Expression of bacteriocin genes in colon model at 24 h with donor 1; **c** Representation of relative abundance at order level in the faecal batch model fermentation for the three donors; **d** Production of SCFA in batch model faecal fermentation using inoculum from three different donors: blue, formate; orange, acetate; red, propionate; purple, butyrate; green, lactate.
